# Supplementary material for: Principle understanding towards synthesizing Fe/N decorated carbon catalysts with pyridinic-N enriched and agglomeration-free features for lithium–oxygen batteries
Source: Royal Society of Chemistry journal article supplement (doi:10.1039/c9ra08207g), 2020-01-01
Supplement: c9ra08207g1.pdf [file c9ra08207g1.pdf]

Supplementary Information for

**Principle understanding towards synthesizing Fe/N decorated carbon catalyst with pyridinic-N enriched and agglomeration-free features for lithium-oxygen battery**

Gangning Zhang<sup>a,b,c</sup>, Li Zhang<sup>b,c</sup>, Shangqian Zhao <sup>\*b,c</sup>, Shigang Lu<sup>\*a,b,c</sup>, Yan Lu<sup>d</sup>, Haobo Sun<sup>b,c</sup> and Lve Wang<sup>b,c</sup>

a. National Power Battery Innovation Center, GRINM GROUP CORPORATION LIMITED (GRINM), No. 2 Xijiekou Wai Street, Xicheng District, Beijing, 100088, PR China.

b. China Automotive Battery Research Institute Co. Ltd, No. 11 Xingke Dong Street, Yanqi Economic Development Zone, Huairou District, Beijing, 101407, PR China.

c. General Research Institute for Nonferrous Metals, No. 2 Xijiekou Wai Street, Xicheng District, Beijing 100088, PR China.

d. Department of Physics, School of Sciences, Nanchang University, Nanchang, Jiangxi, 330031, PR China.

\* Corresponding authors, E-mail: zhaosq@glabat.com (S Zhao); lusg8867@163.com (S Lu)

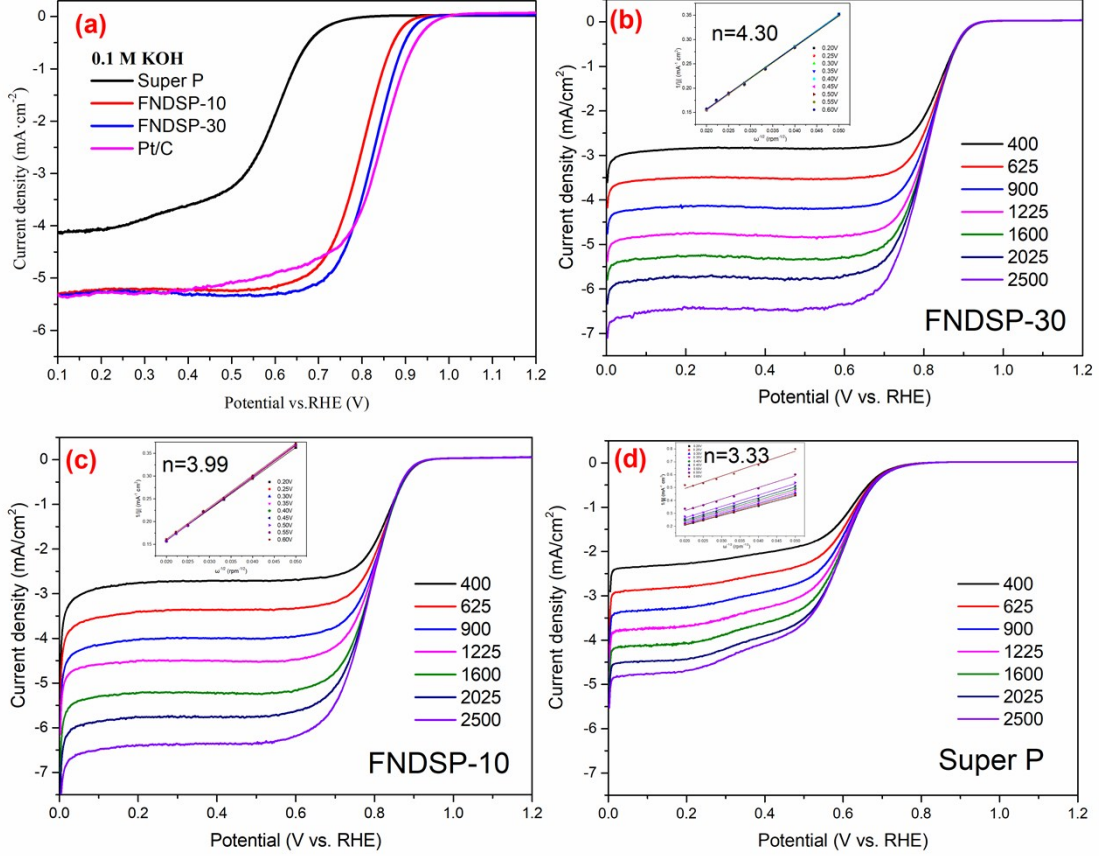

**Fig.S1** (a) Linear sweep voltammograms (LSV) curves for ORR of FNDSP-10, FNDSP-30, Super P and commercial Pt/C (20 wt%) at the electrode rotation rate of 1600 rpm and potential scan rate of 10 mV s<sup>-1</sup>. (b-d) Polarization curves for ORR on FNDSP-30, FNDSP-10 and Super P electrodes in O<sub>2</sub>-saturated 0.1 M KOH solution at various rotation rates. The inset images are Koutecky–Levich plots of corresponding materials at different electrode potentials.

The Koutecky-Levich (K–L) plots ( $J^{-1}$  vs.  $\omega^{-1/2}$ ) and the electron transfer number ( $n$ ) and in Fig.S1 (b-d) were obtained using the Koutecky–Levich (K–L) equations below:

$$\frac{1}{j} = \frac{1}{j_k} + \frac{1}{j_D} = \frac{1}{j_k} + \frac{1}{B\omega^{1/2}} \quad (1)$$

$$B = 0.62nFD_{O_2}^{2/3}v^{-1/6}C_{O_2} \quad (2)$$

The parameters in above equations are depicted as follows:  $j$ ,  $j_k$ , and  $j_D$  are the measured, kinetic, and diffusion limited current densities respectively,  $\omega$  is the electrode rotating rate,  $n$  is the electron transfer number,  $F$  is the Faraday constant

( $96485 \text{ C mol}^{-1}$ ),  $D_{O_2}$  is the oxygen diffusion coefficient ( $1.9 \times 10^{-5} \text{ cm}^2 \text{ s}^{-1}$ ),  $\nu$  is the kinetic viscosity of the 0.1M KOH solution ( $0.01 \text{ cm}^2 \text{ s}^{-1}$ ) and  $C_{O_2}$  is the bulk concentration of oxygen ( $1.2 \times 10^{-3} \text{ mol L}^{-1}$ ).

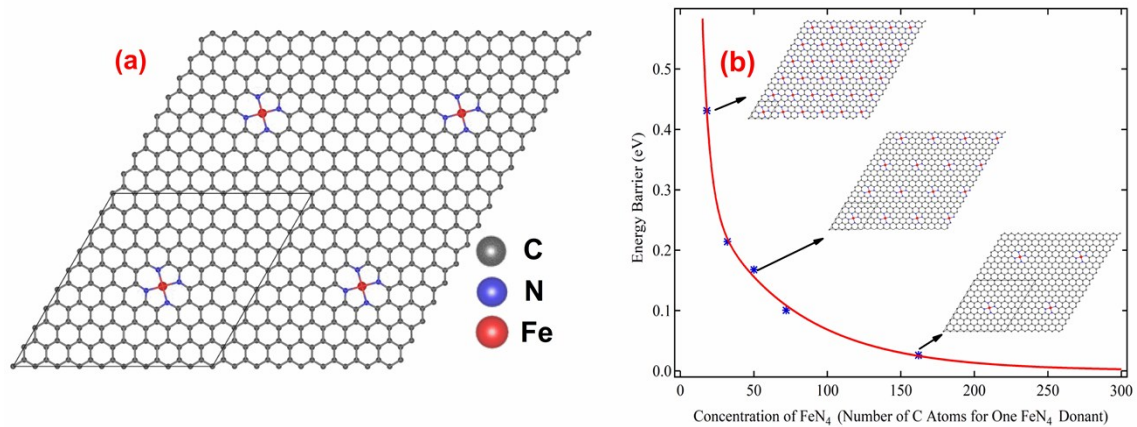

**Fig.S2** (a) Atomistic models of FeN<sub>4</sub>-doped carbon matrix. Fe, N, C elements are represented in different colors as illustrated. (b) Correlation between rising energy barrier and concentration (number of C atoms for one FeN<sub>4</sub> dopant) of FeN<sub>4</sub> (the blue point is the calculated result by first-principle and the red line is the fitting result).

**Table. S1** Comparison of the mean voltages between FNDSP-30 (right side of the slash) and Super P cathode materials (left side of the slash) for Li-O<sub>2</sub> batteries at different cut-off voltages.

| Cutoff voltage | Specific capacity (mAh/g) | Mean voltage (V) |
|----------------|---------------------------|------------------|
| 2.2V           | 3963.1 / ---              | 2.6230 / ---     |
| 2.5V           | 3689.3 / 5811.5           | 2.6237 / 2.7432  |
| 2.6V           | 2770.7 / 5607.5           | 2.6355 / 2.7427  |
| 2.7V           | 17.9 / 4706.7             | 2.7102 / 2.7542  |
| 2.8V           | --- / 839.7               | --- / 2.8156     |

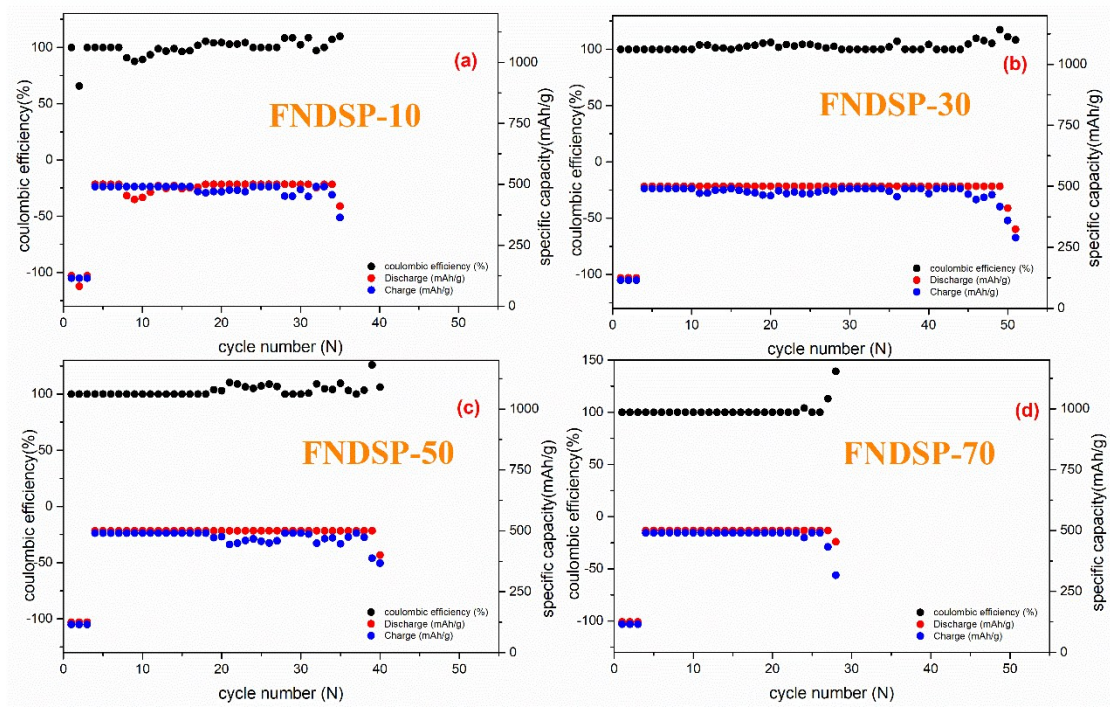

**Fig. S3** Discharge capacity and roundtrip efficiency versus the cycle number for Li-O<sub>2</sub> cell with FNDSP air electrode at 0.1 mA.cm<sup>-2</sup> with the cutoff capacity of 500mAh/g (The initial 3 cycles of Li-O<sub>2</sub> cells used a small cutoff capacity (125mAh/g) to activate the battery).

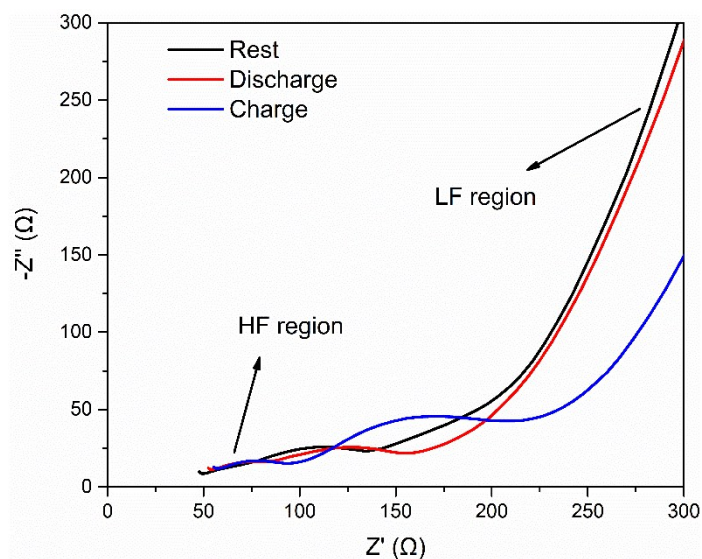

**Fig. S4** The a.c. impedance spectra comparison of the Li–O<sub>2</sub> cell using FNDSP-30 electrode before discharge (Rest), after discharge and after charge. The frequency sweep range was 0.1Hz-1MHz with an amplitude of 5mV.

The a.c. impedance spectra were collected on Autolab PGSTAT302N. And we used the FNDSP-30 cathode material as a representation to reflect the impedance variety rules for Li–O<sub>2</sub> batteries at the three states depicted in Fig.S4. The high-frequency semicircle was attributed to the impedance associated with ion adsorption and desorption at the electrified interface, and the impedance decreased according to “after charge” > “after discharge” > “Rest”. This result has indicated an increase of the impedance at the electric double layer of the electrode with the raise of discharge-charge depth of the battery.
